# Supplementary material for: Agricultural Value Chains. A Bibliometric Review and Analysis.
Source: Preprints.org preprint supplement (doi:10.20944/preprints202108.0063.v1), 2021-08-02
Supplement: Supplementary file 1 [file supplementary]

**Portoviejo, July 30, 2021**

**Dear Sirs:**

**Editors Journal MPDI**

**Present.**

Hereby, based on the provisions of the Copyright Law, the undersigned: Iván Analuisa, Juan Jimber, José Fernández and Andrés Vergara, we have submitted for publication in the Journal MPDI, the scientific article entitled: Agricultural value chains. A bibliometric review and analysis. belonging to the Research Group of the Agricultural, Economic, Social, and Political Department of the Faculty of Economics and Business, based on the Doctoral Studies in Social, Legal and Economic Sciences of the University of Cordoba in Spain. With the aforementioned considerations, the work team is made up of the following people, who actively collaborate in the research activities. We have participated in congresses and academic events with related topics as a result of the international teamwork resulting from the work of our authorship.

With respect to the presentation of the authors we consider in order of authorship:

1. Analuisa Aroca, Iván Alberto (Corresponding author) Mail: z82anari@uco.es, <https://orcid.org/0000-0002-3798-3122> Department Agricultural Economics, Sociology, and Policy, Faculty of Economics and Business Sciences, Universidad de Córdoba, Plaza de Puerta Nueva s/n, 14002 Cordoba, Spain
2. Fernández Gallardo, José Antonio Mail: jose.fernandez@uco.es, <https://orcid.org/0000-0002-3003-3909> Department Agricultural Economics, Sociology, and Policy, Faculty of Economics and Business Sciences, Universidad de Córdoba, Plaza de Puerta Nueva s/n, 14002 Cordoba, Spain
3. Jimber del Río, Juan Antonio Mail: jjimber@uco.es, <https://orcid.org/0000-0001-6886-7434> Department Agricultural Economics, Sociology, and Policy, Faculty of Economics and Business Sciences, Universidad de Córdoba, Plaza de Puerta Nueva s/n, 14002 Cordoba, Spain
4. Vergara-Romero, Arnaldo, Mail: econandresvergara@gmail.com <https://orcid.org/0000-0001-8503-3685> Department of Research, Ecotec University, Samborondón-Ecuador and Espiritu Santo University, Samborondón, Ecuador

Therefore, the undersigned author(s) DECLARE:

That the research work indicated is an original work. That it has not been previously published by any means.

That it has not been submitted simultaneously to other printed or digital publications, nor is it pending evaluation for publication in any other medium, in any format.

That, if the article is published, all copyrights are transferred to the **Journal MPDI** without whose express permission none of the material published therein may be reproduced.

That the work submitted does not contain scandalous material, slander, libel, defamation, obscenity, fraud or any other illegal material; and neither the work nor the title infringes any copyright, literary right, trademark or property right of third parties. We assume full responsibility for all the points and opinions contained in the submitted work.

By virtue of the foregoing, we expressly state that we do not reserve any rights against: **Journal MPDI**.

Sincerely yours:

Iván Analuisa

A complex, circular handwritten signature in blue ink, consisting of multiple overlapping loops and lines.

Juan Antonio Jimber

A handwritten signature in blue ink, featuring a long horizontal stroke with a vertical line intersecting it near the right end.

José Antonio Fernández

A handwritten signature in blue ink, with the name 'José Antonio Fernández' written in a cursive style.

Arnaldo Vergara

A handwritten signature in blue ink, consisting of the letters 'V' and 'R' written in a stylized, cursive manner.
